# Supplementary material
Source: PubMed Central journal article supplement (PMC4621956)
Supplement: NIHMS705047-supplement-2.pdf [file NIHMS705047-supplement-2.pdf]

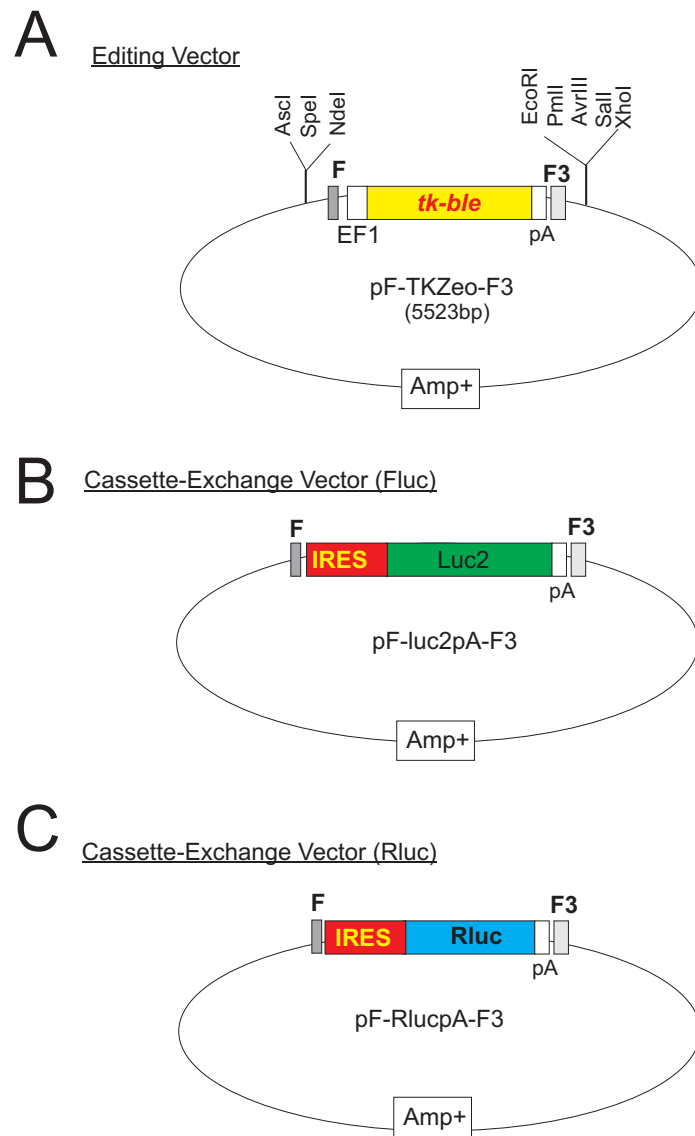

**Figure S1:** Related to Figure 2. Schematic maps of vectors used for generating recombinant cells carrying a bicistronic *in-situ* reporter.

**A**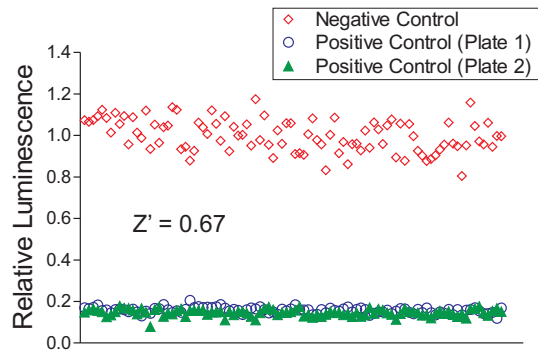**B**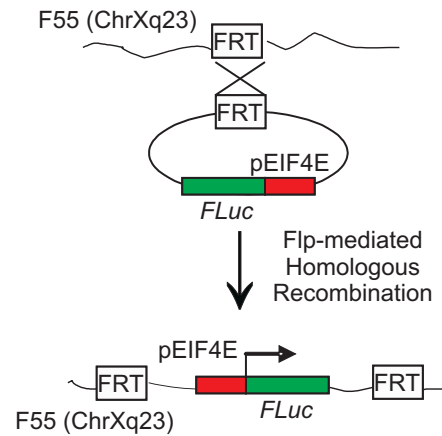**Figure S2:** Related to Figure 3.

**(A)** Reproducibility analysis of the reporter assay for drug screening. Cells in 96-well plates were treated with 1  $\mu$ M of the general transcription inhibitor, Actinomycin D (Positive Control, two plates), or DMSO (Negative Control, one plate) for 16 h and lysed for luciferase activity assays. The assay results from two positive-control plates were combined and used to calculate  $Z'$ .

**(B)** The schematic shows that Flp-mediated homologous recombination between FRT sites result in integration of the *FLuc* gene driven by a cloned EIF4E promoter into the predefined F55 genomic location. The F55 site is localized in Chromosome X, which is different from the *EIF4E* gene locus.

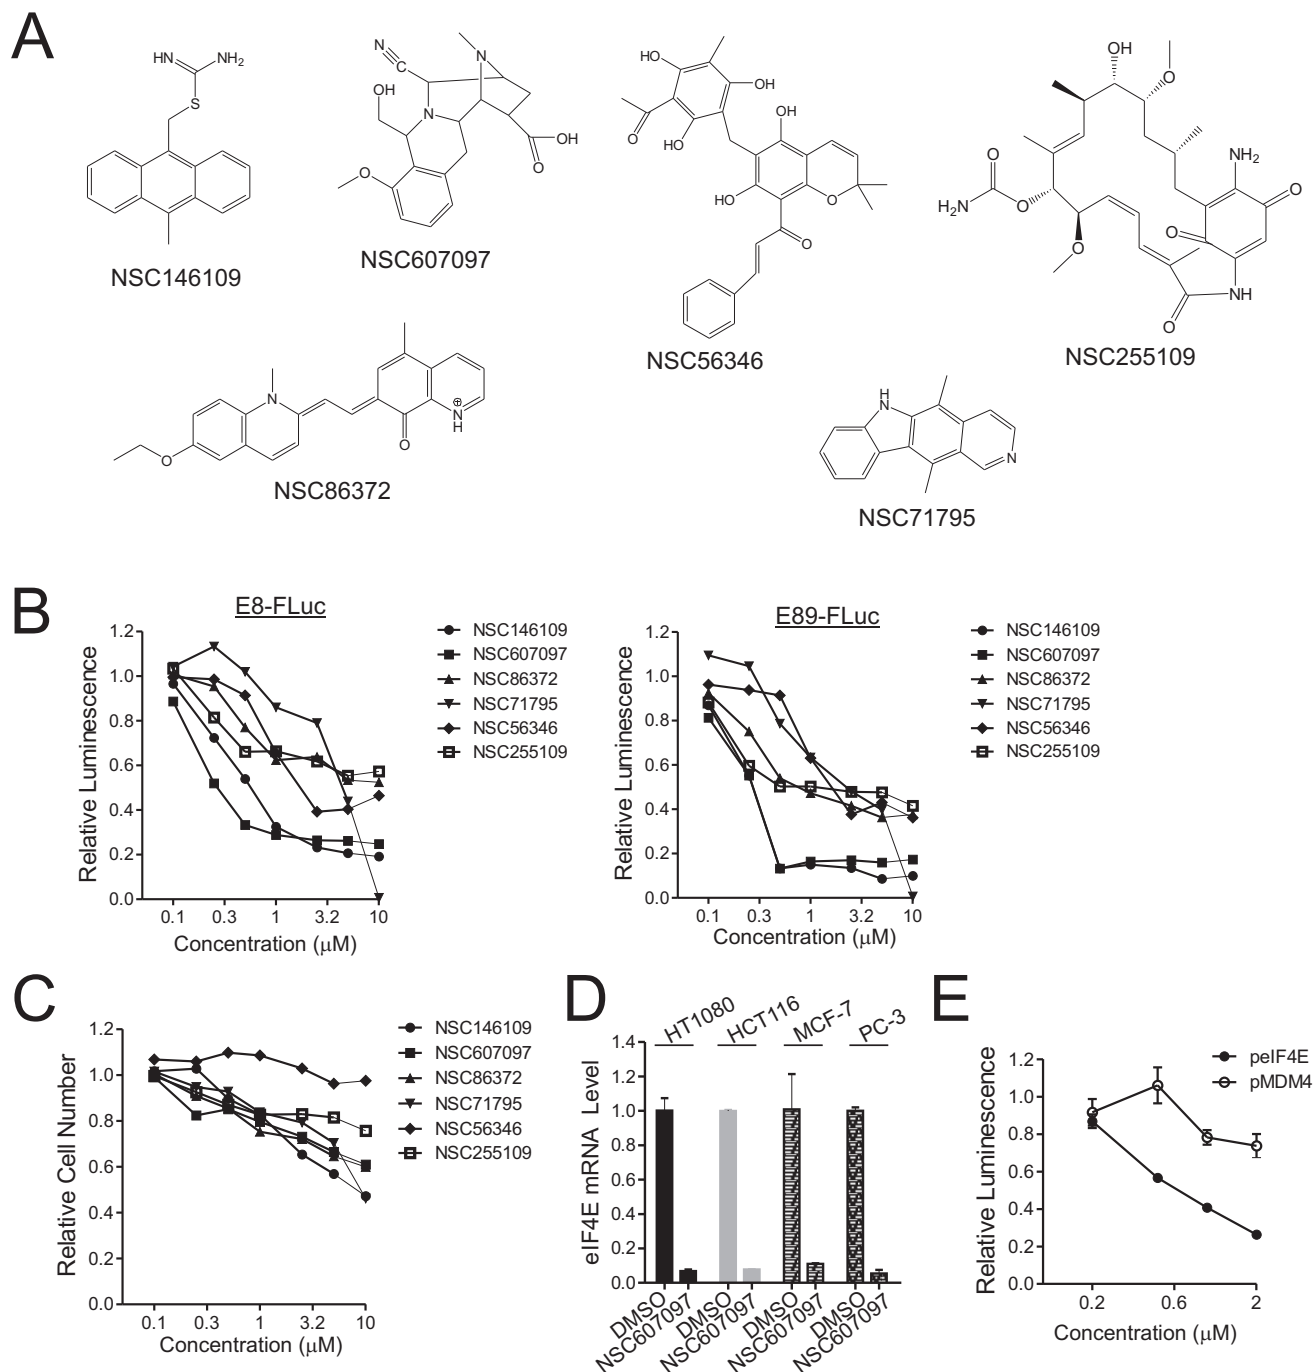

**Figure S3:** Screening positive hits and their characterization; Related to Figure 3.

**A.** Chemical structures of the 6 positive screen hits validated by qRT-PCR.

**B.** Concentration-dependent effects of the screen hits on reporter activity in two independent clones (E8-FLuc, left; E89-FLuc, right) carrying the bicistronic FLuc reporter. These two clones were derived from two independent targeting experiments.

**C.** MTT assays to evaluate cytotoxicities of indicated compounds. E8-FLuc cells were treated with indicated compounds for 16 h for MTT assays.

**D.** Inhibition of *EIF4E* expression by NSC607097 in various human cancer cells as measured by qRT-PCR. Error bars represent standard deviation (SD).

**E.** NSC607097 decreased the *eIF4E* promoter activity but not the MDM4 promoter activity, demonstrating its specificity on *EIF4E* expression. Error bars represented SD.

**Table S2.** Known biological activities of screen hits (related to Figure 3)

| Compound   | Other Name  | Reported Activity                                         |
|------------|-------------|-----------------------------------------------------------|
| NSC 146109 | XI-011      | inhibits MDMX transcription                               |
| NSC 607097 | DX-52-1     | Inhibits HIF-1 transactivation; binds to microtubules     |
| NSC 86372  | CCG-37281   | chelate metal ions and inhibit metalloproteinase activity |
| NSC 71795  | ellipticine | DNA intercalator; inhibit topoisomerase II                |
| NSC 56346  | rottlerin   | potassium channel opener; non-specific PKC inhibitor      |
| NSC 255109 | 17-AG       | Geldanamycin derivative and binds to HSP90                |

**Table S3.** Primers used in this study (Related to Experimental Procedure)

| Primer                   | Sequence (5' to 3')             |
|--------------------------|---------------------------------|
| Cloning                  |                                 |
| Left homology arm        |                                 |
| EIF4E-LA-For             | AGGCGCGCCATTATCCTTTTGACCTCGTG   |
| EIF4E-LA-Rev             | GGACTAGTATTGCTTGACGCAGTCTCCT    |
| Right homology arm       |                                 |
| EIF4E-RA-For             | GACGAATTCGAGATTTGGGAGCTGAACCA   |
| EIF4E-RA-Rev             | CGACCTAGGAGAGACTGCCTTGCAATAAG   |
| PCR Screening            |                                 |
| LA-F                     | TCTCGATCTCCTGACCTCGT            |
| LA-R                     | ACCTTCTCTAGGCACCCGTT            |
| RA-F                     | AGATCcgcgGGAAGTTCCTAT           |
| RA-R                     | TCCCCACCACCTGTACTTTC            |
| RMCE-F                   | TTATCAGTCCCACGCAGACA            |
| RMCE-R                   | AGGAACTGCTTCCTTCACGA            |
| sgRNA cloning            |                                 |
| sgEIF4E-For              | CACCGtgcgtcaagcaatcgagatt       |
| sgEIF4E-Rev              | AAACaatctcgattgcttgacgcaC       |
| Northern blotting probes |                                 |
| EIF4E-probe-For          | aaaggatccaccatggcgactgtcgaacc   |
| EIF4E-probe-Rev          | GGCTCGAGttaAACAACAAACCTATTTTTAG |
| FLuc-probe-1             | GGATGGCAGAAGCTATGAAG            |
| FLuc-probe-2             | AATGGGAAGTCACGAAGGTG            |
| QRT-PCR                  |                                 |
| EIF4E-For                | TGGCGACTGTCTGAACCG              |
| EIF4E-Rev                | AGATTCCGTTTTCTCCTCTTCTGTAG      |
| GAPDH-For                | CAGCCTCAAGATCATCAGCA            |
| GAPDH-Rev                | TGTGGTCATGAGTCCTTCCA            |
